# Supplementary material
Source: PubMed Central journal article supplement (PMC9156727)

# Supplementary figure 1: IEC-subset specific gene expression in the ileal and colonic epithelium.

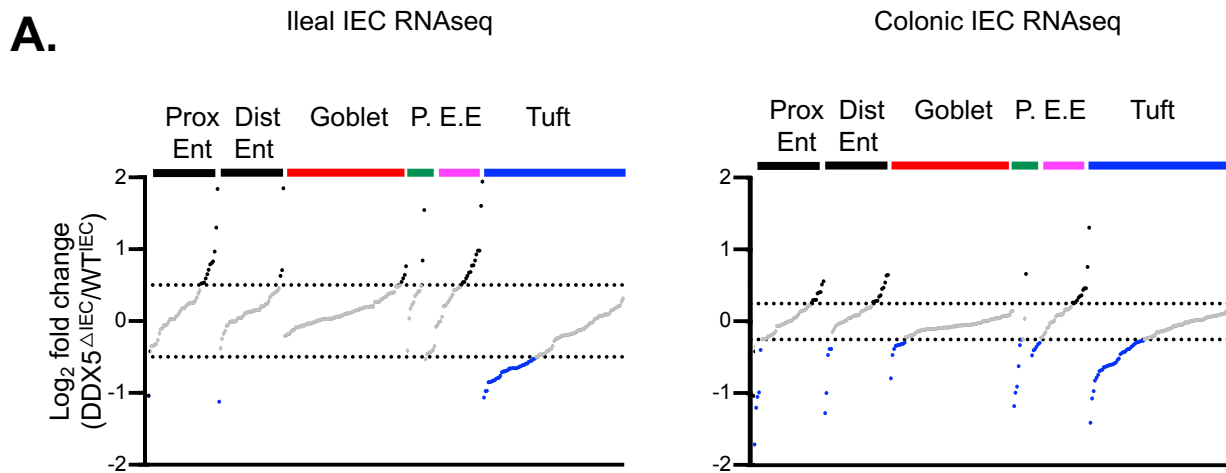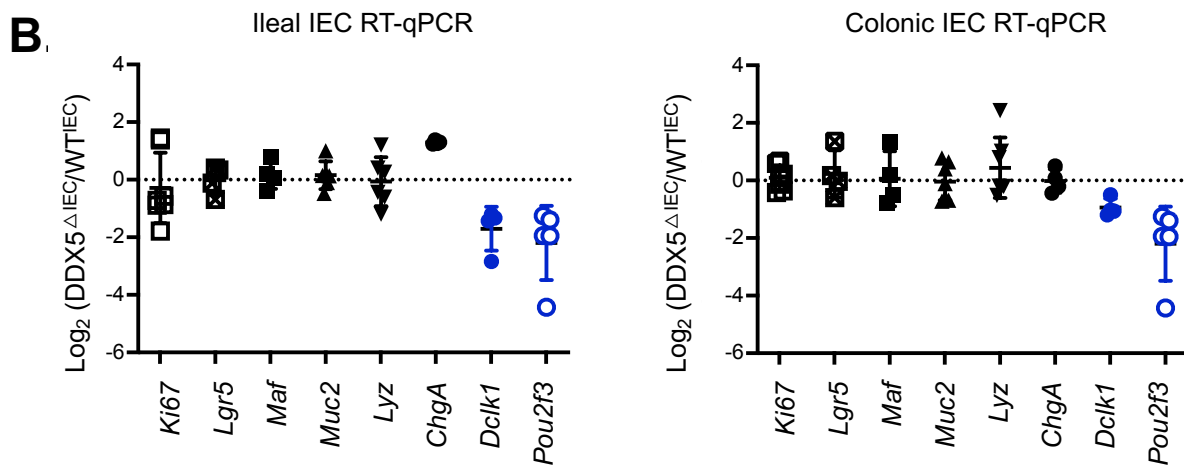

# Supplementary figure 2: Intestinal crypt density and goblet cell numbers are DDX5-independent.

**A.**

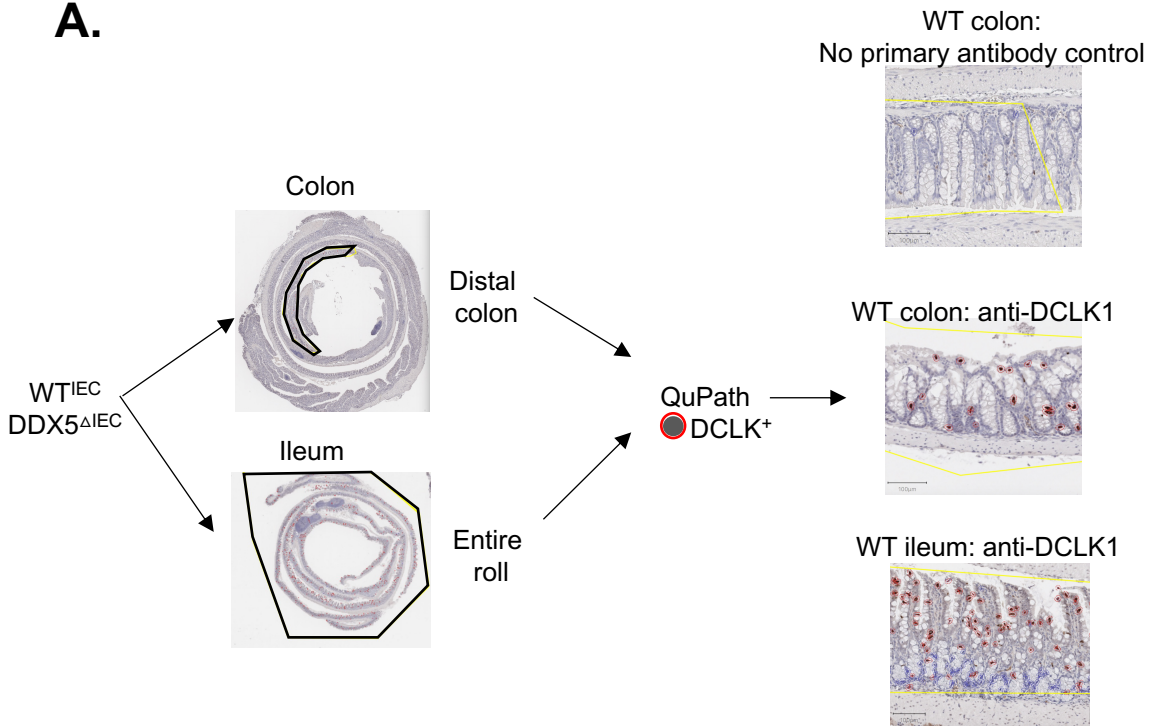

**B.**

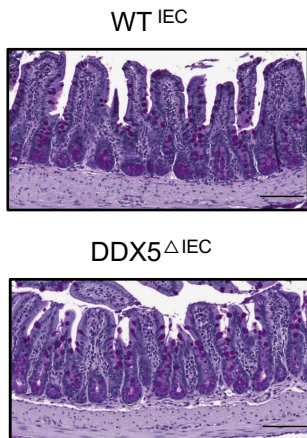

**C.**

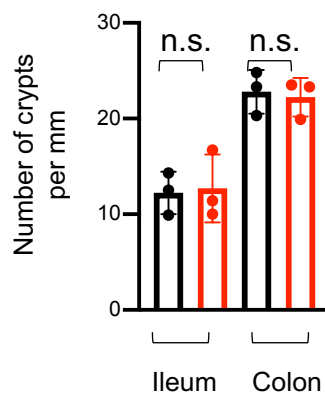

**D.**

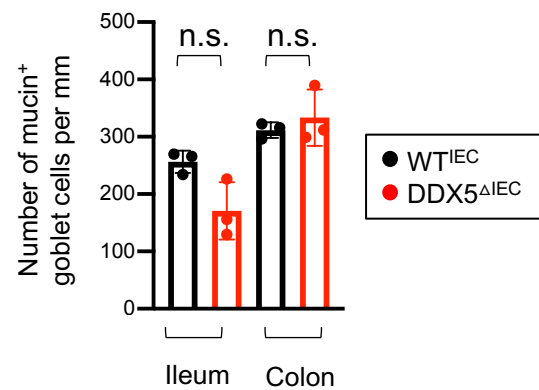

# Supplementary figure 3: Tuft cell gating strategy.

**A.**

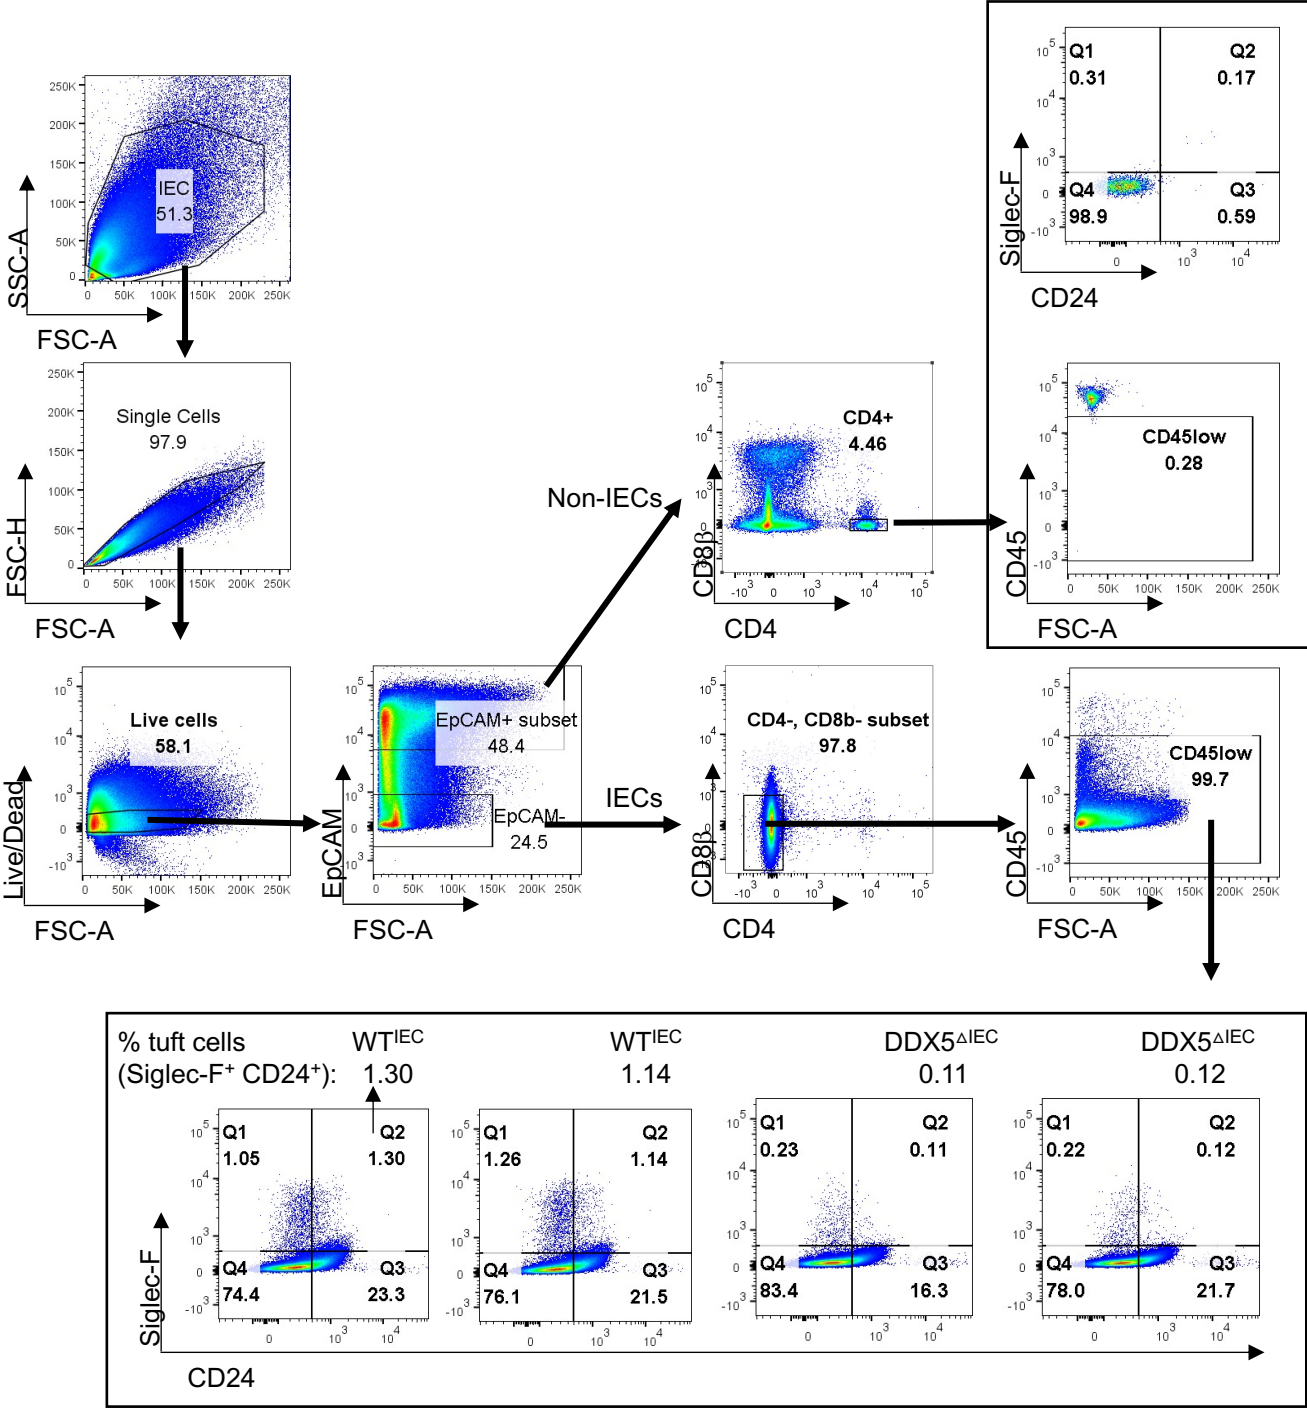

Supplementary figure 4. **DDX5 dependency of IEC subset defining genes in the small intestinal ISC and secretory lineage progenitors.**

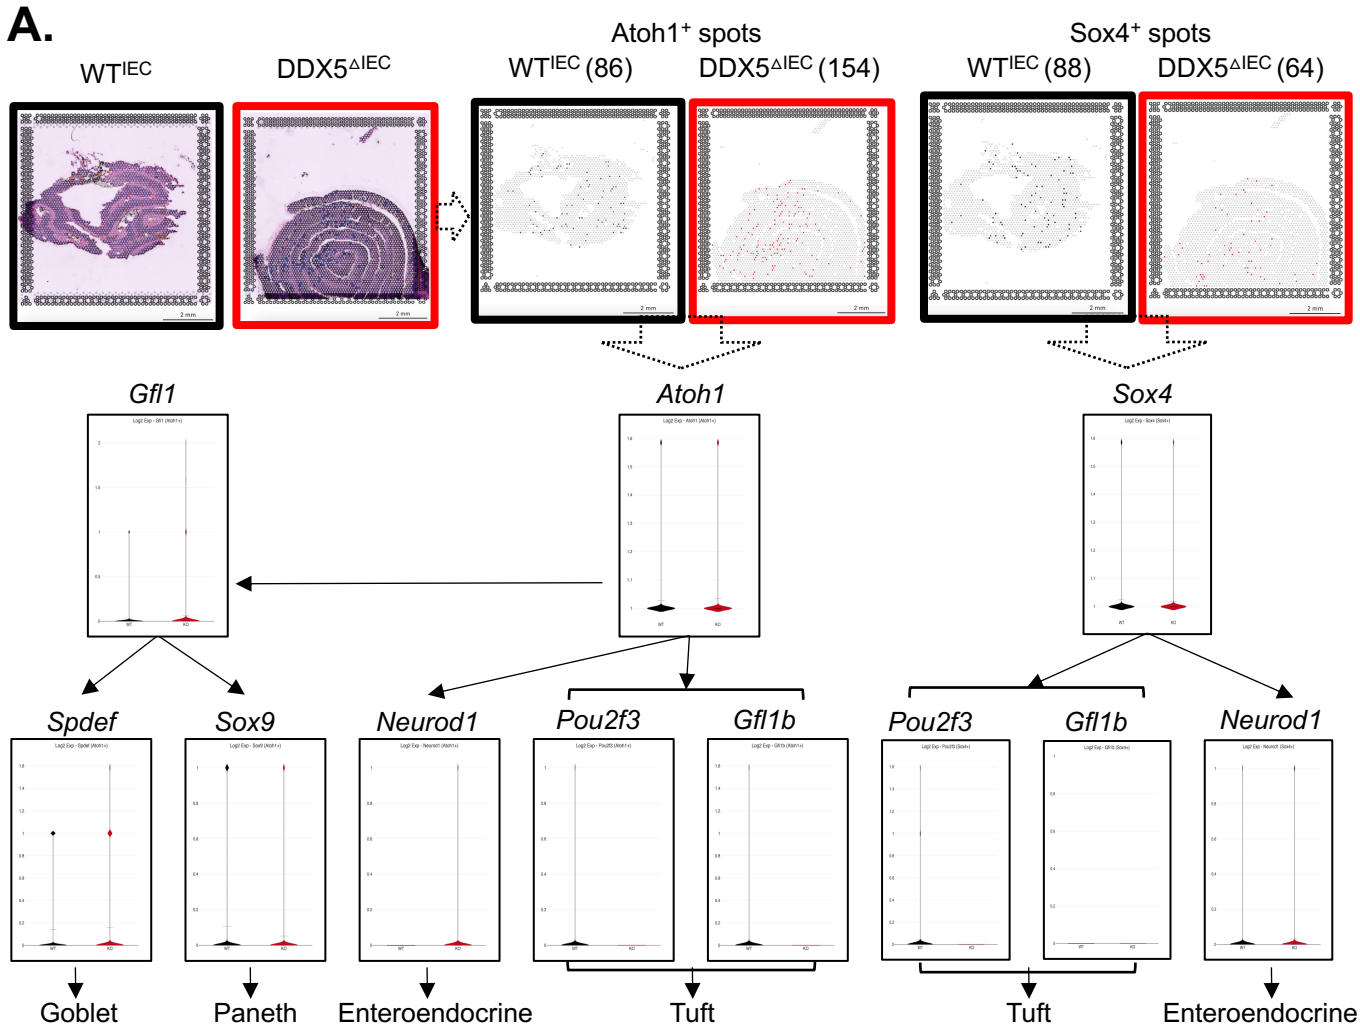

**B.** DDX5 dependent genes  
( $pV < 0.05$ , Log<sub>2</sub> fold change  $> 4$  or  $< -4$ )

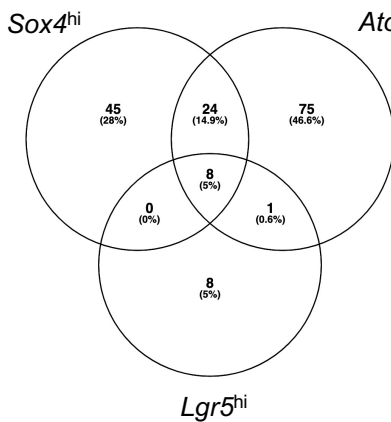

**C.**

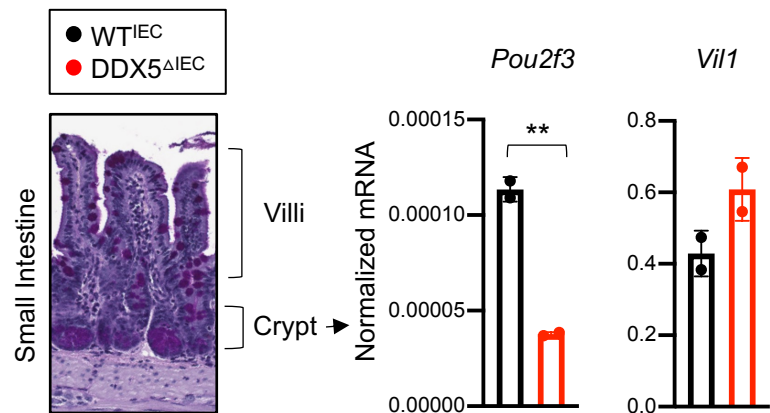

# Supplementary figure 5. **DDX5** is not involved in intestinal organoid survival and growth.

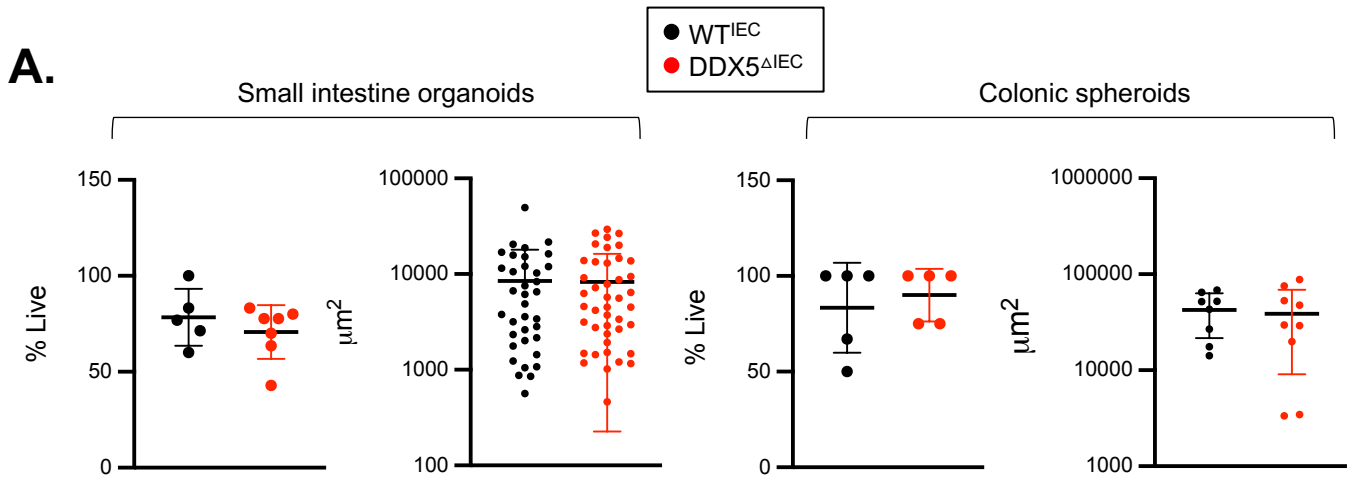

# Supplementary figure 6. Similar type 2 cytokines and trichomonas levels in WT<sup>IEC</sup> and DDX5<sup>ΔIEC</sup> mice.

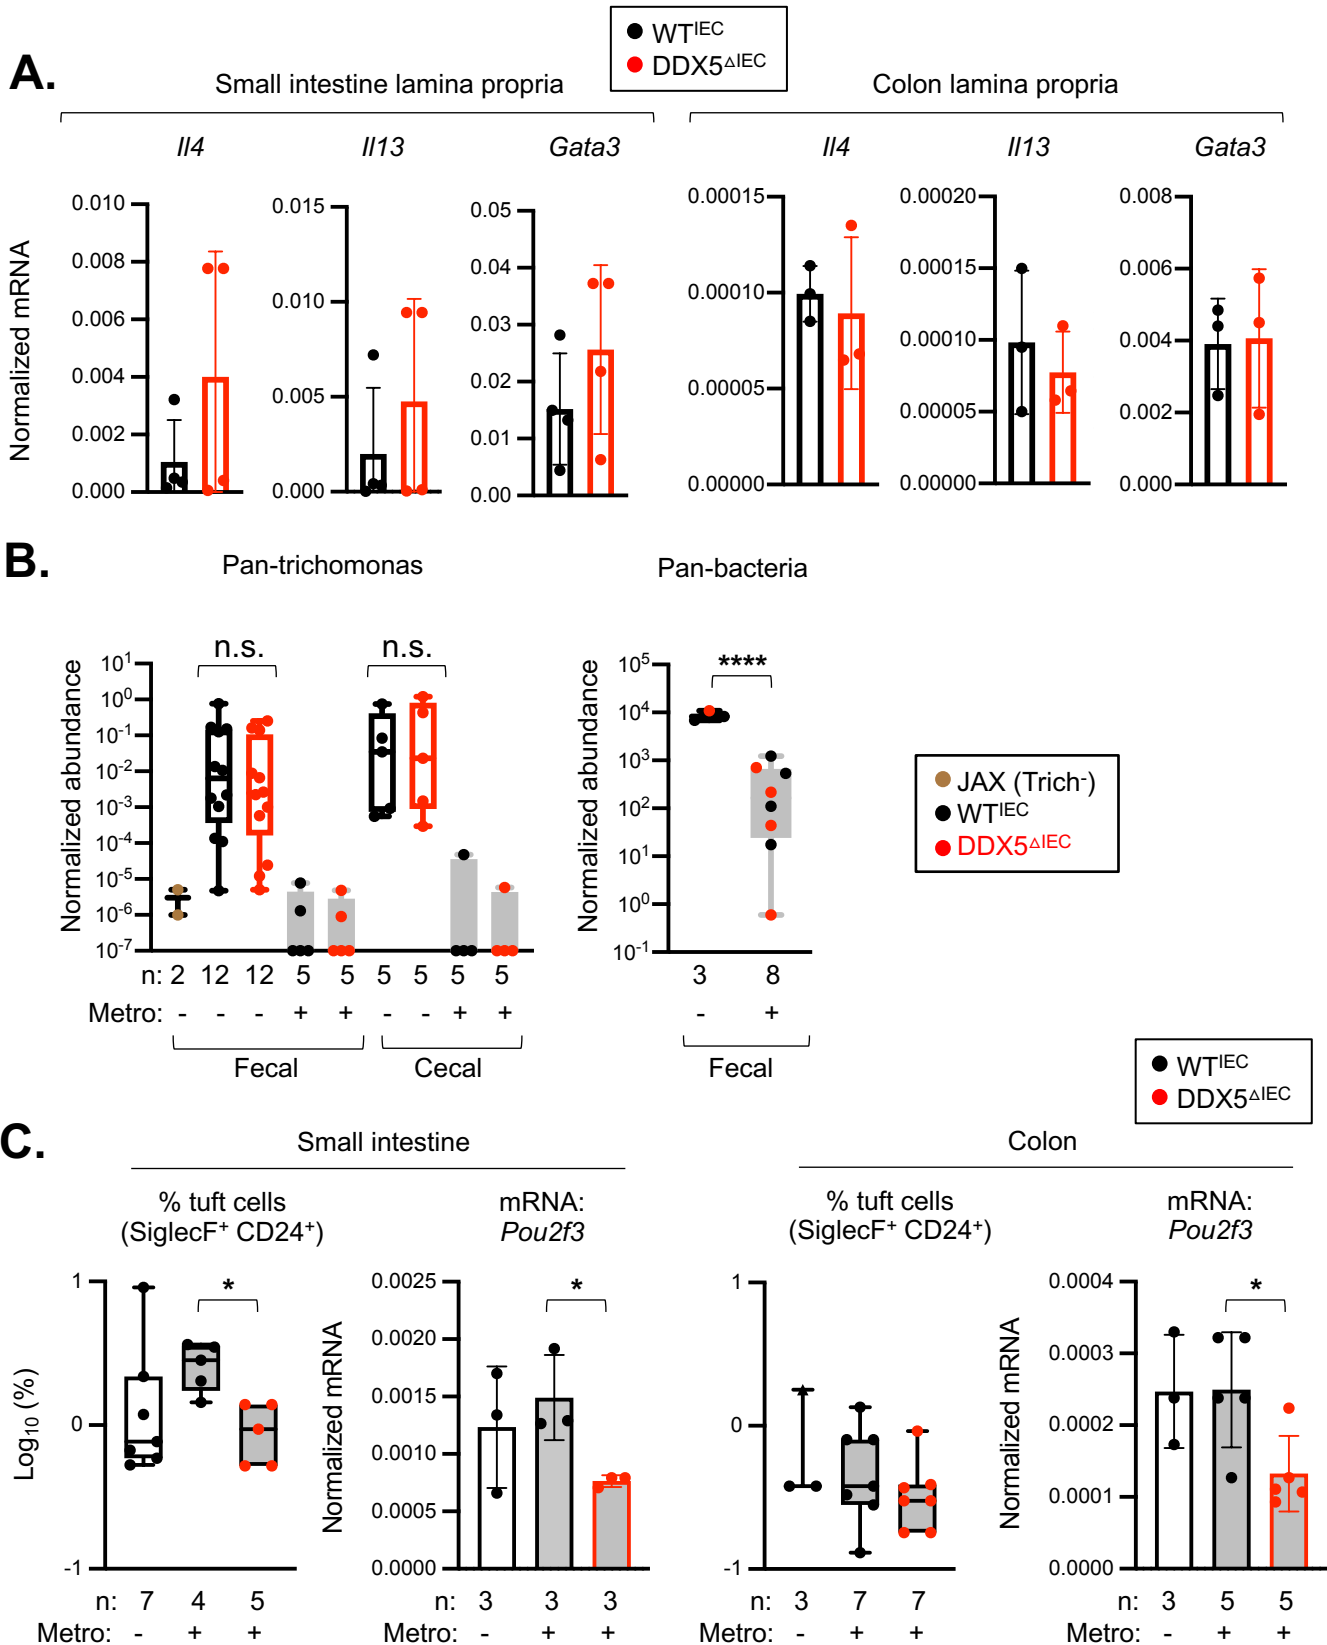

# Supplementary figure 7. IL-13 driven tuft cell hyperplasia is DDX5-independent.

**A.**

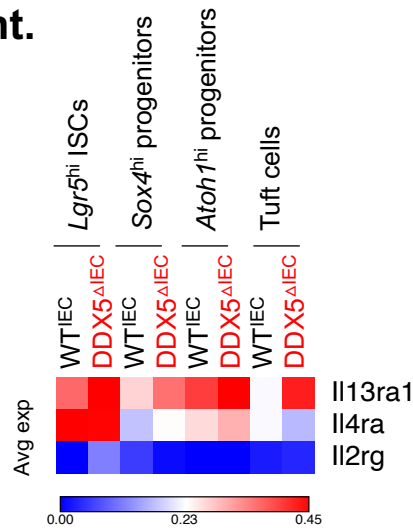

**B.**

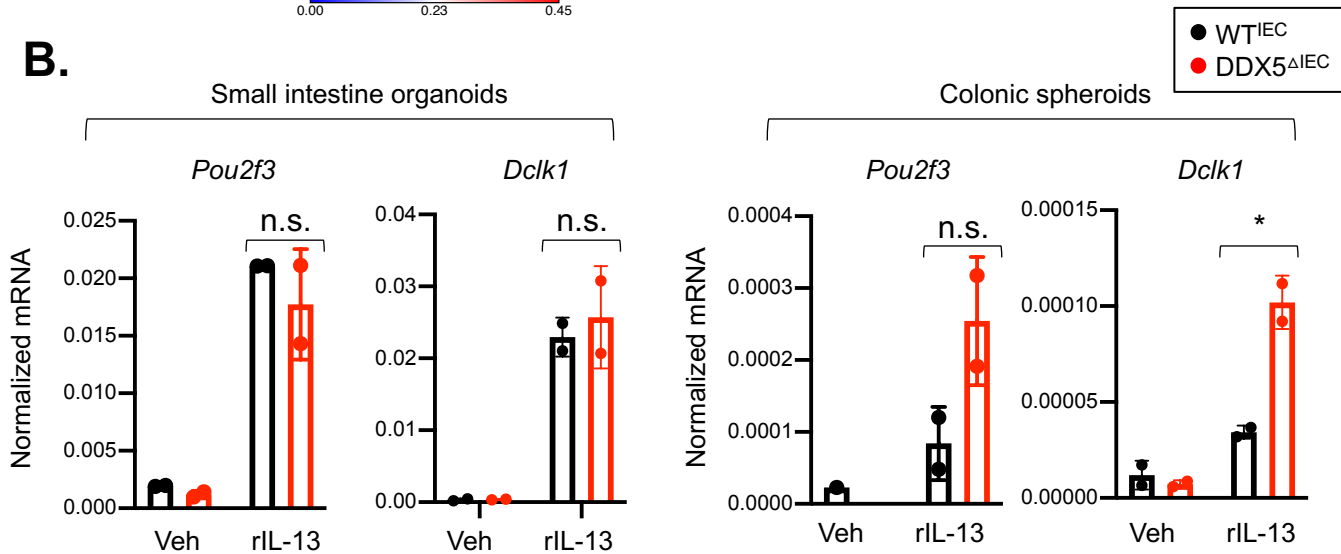

**C.**

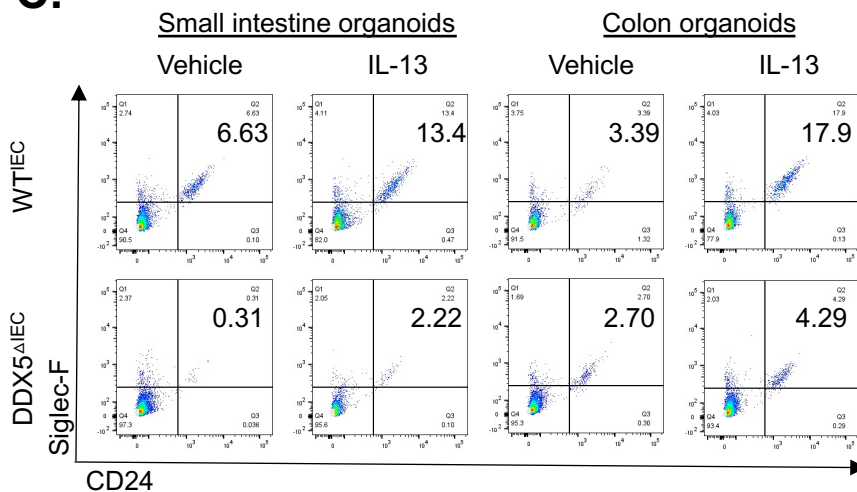

**D.**

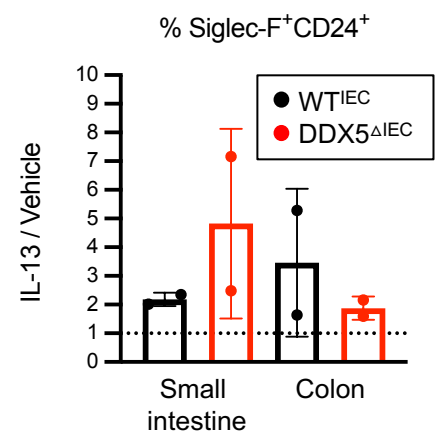

# Supplementary figure 8: Restoring CDC42 protein levels in $DDX5^{\Delta IEC}$ small intestinal organoids.

**A.**

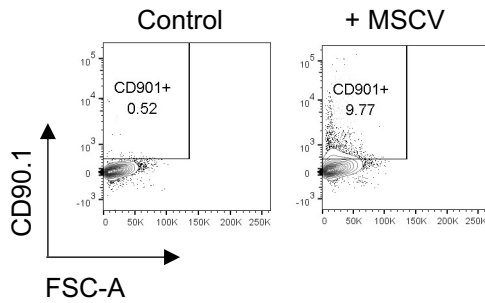

**B.**

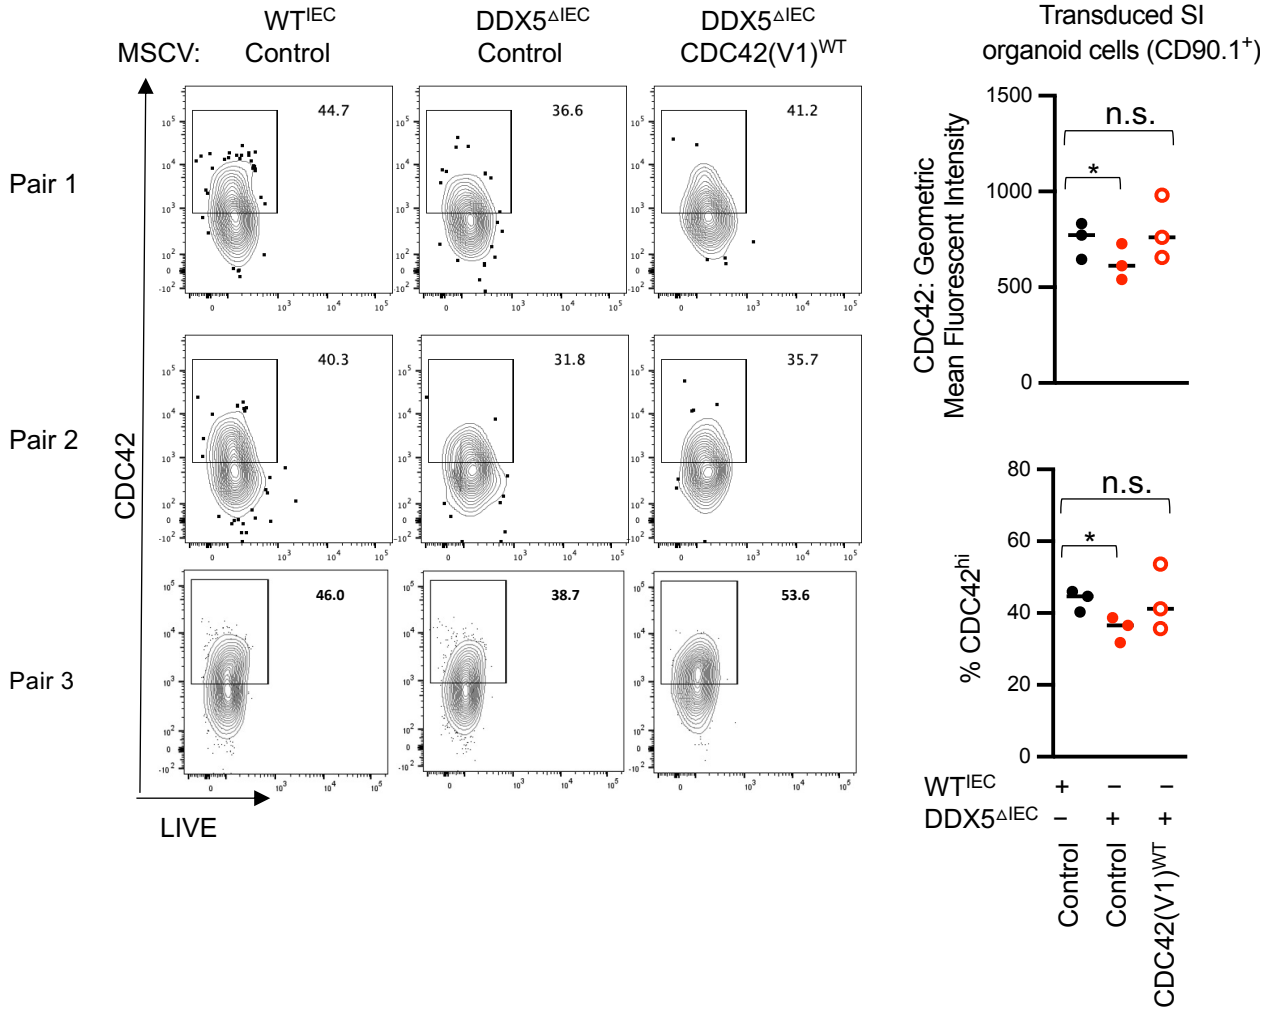



**Supplementary figure 9: Transient inhibition of CDC42 activity did not alter wildtype intestinal organoid viability, growth, or response to IL-13 stimulation.**

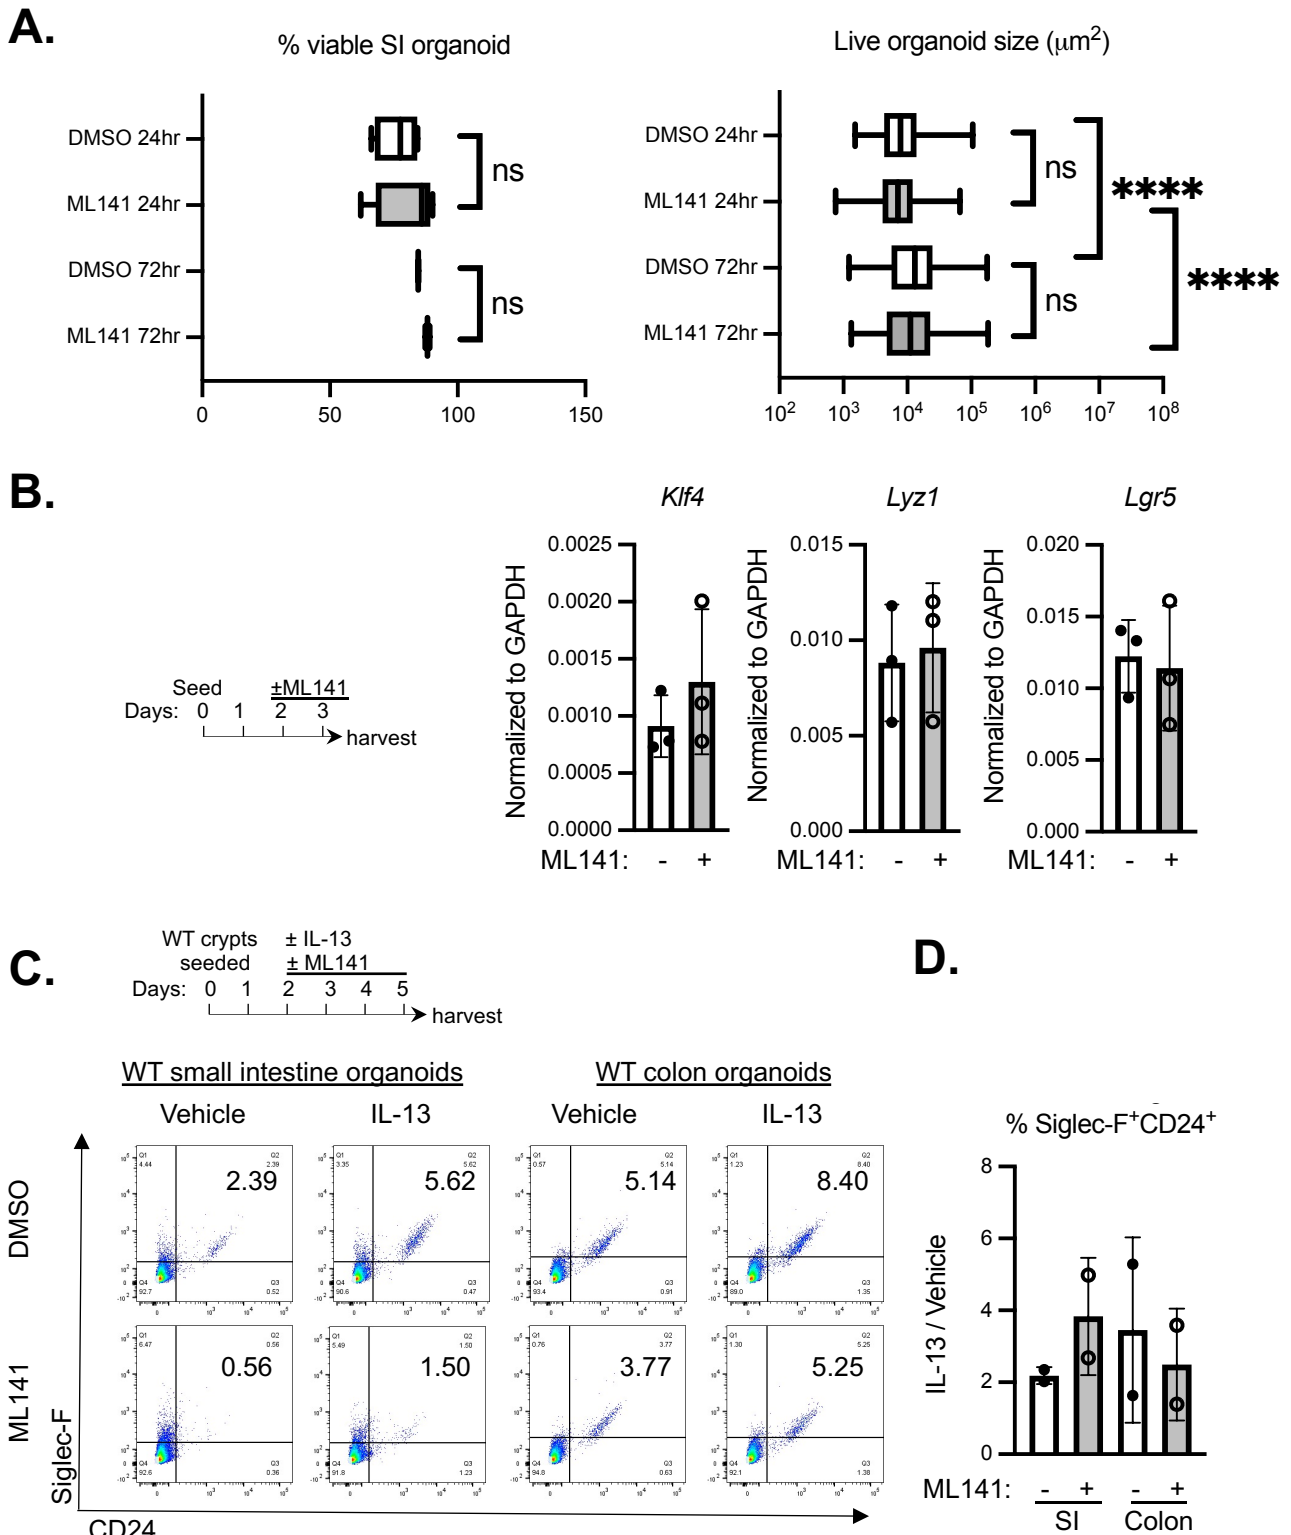

# Supplementary figure 10: DDX5 promotes both type 1 and type 2 tuft cell programs in the small intestine.

**A.**

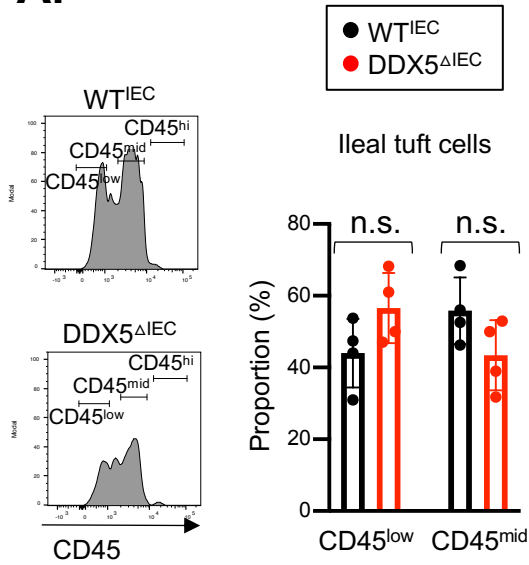

**B.**

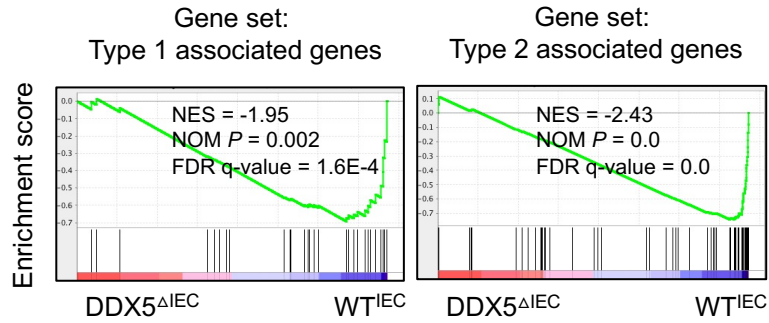

# Supplementary figure 11: DDX5-dependent and -independent genes among small intestinal IEC lineages.

**A.**

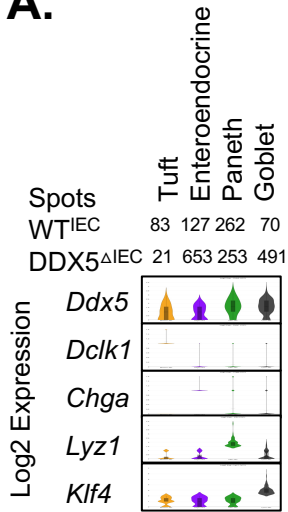

**B.**

Genes downregulated in DDX5 $\Delta$ IEC

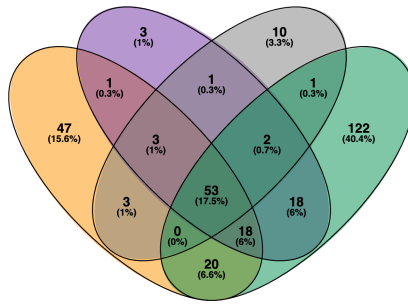

Genes upregulated in DDX5 $\Delta$ IEC

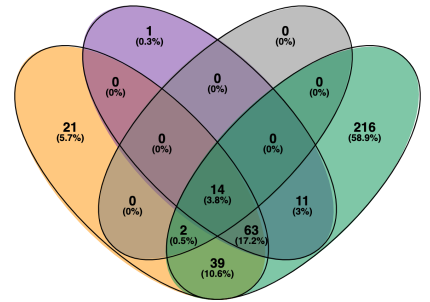

# Supplementary figure 12: DDX5-dependent viral and bacterial populations in the murine intestine.

**A.**

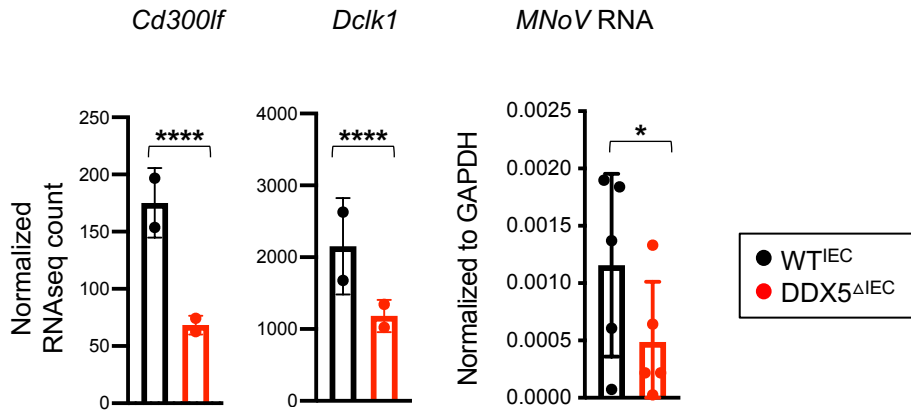

**B.**

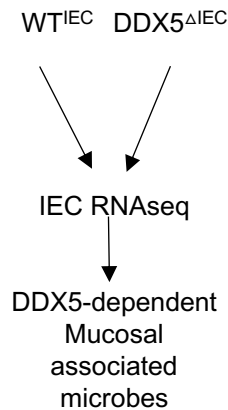

**C.**

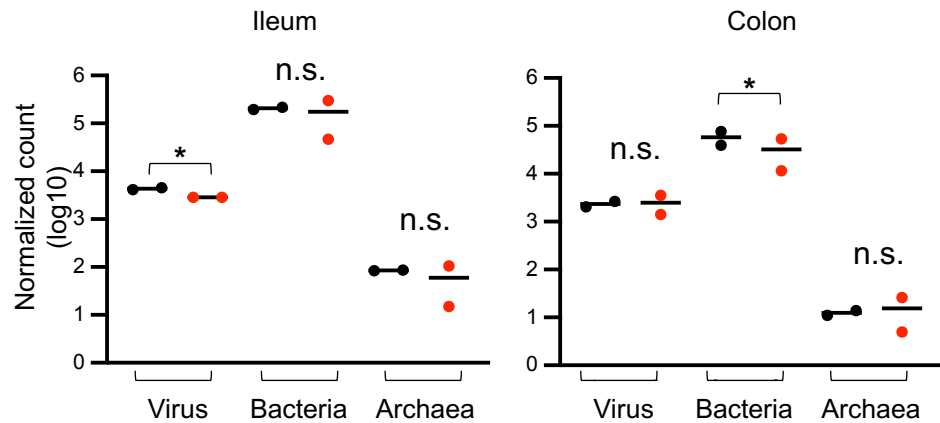

**D.**

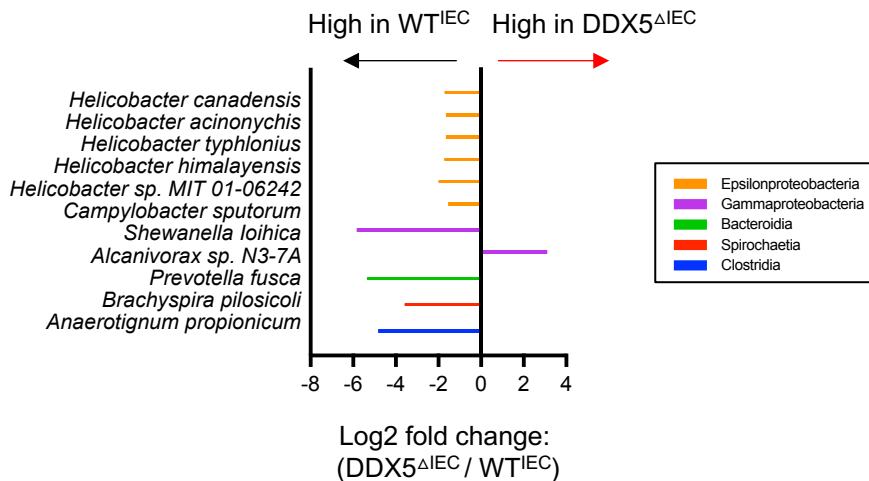

# Supplementary figure 13: DDX5-dependent programs in colonic tumors.

**A.**

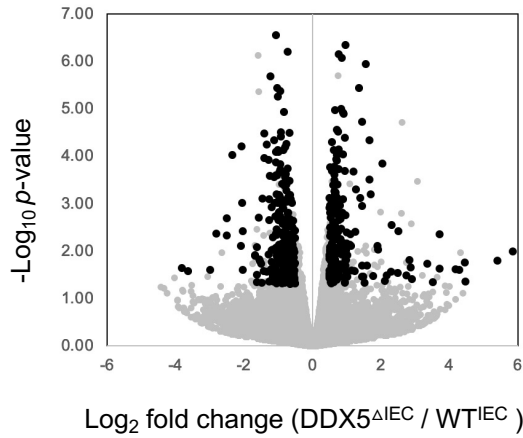

**B.**

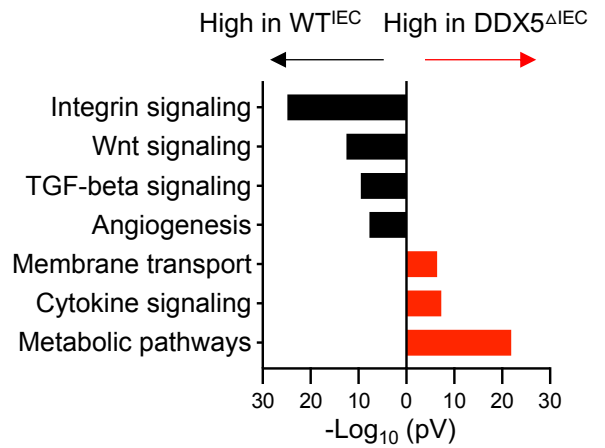

**C.**

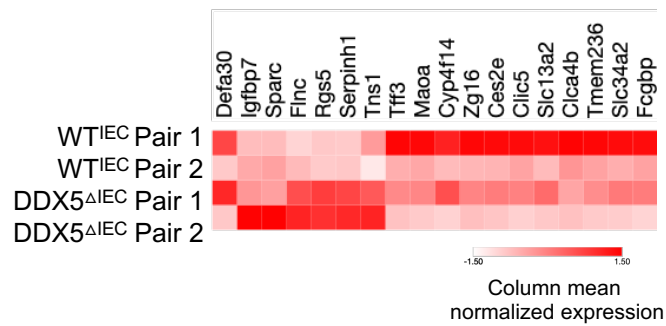

Supplement: NIHMS1759808-supplement-Supp1.pdf [file NIHMS1759808-supplement-Supp1.pdf]
