# Supplementary material
Source: PubMed Central journal article supplement (PMC9156727)
Supplement: NIHMS1759808-supplement-Supp2.pdf [file NIHMS1759808-supplement-Supp2.pdf]

Supplementary Table S1. **Antibody information**

| <b>Name</b>                                | <b>Catalog number</b> | <b>Company</b> |
|--------------------------------------------|-----------------------|----------------|
| DDX5 (eCLIPseq)                            | ab53216               | Abcam          |
| DCLK1 (IHC)                                | ab37994               | Abcam          |
| CDC42 (Western)                            | 2466S                 | Cell Signaling |
| CDC42 (Flow)                               | MA532472              | Thermo Fisher  |
| Siglec-F (APC, flow)                       | 562680                | BD Biosciences |
| CD45 (PE, flow)                            | 103105                | BioLegend      |
| CD24 (FITC, flow)                          | 11-0241-82            | eBiosciences   |
| EpCAM (PE-Cy7, flow)                       | 118215                | BioLegend      |
| CD8b (APC-Cy7, flow)                       | 126619                | BioLegend      |
| CD4 (Pacific Blue, flow)                   | 100428                | BioLegend      |
| anti-Rabbit IgG (APC, flow)                | A-10931               | Invitrogen     |
| Anti-RPL10A antibody<br>(Ribosome capture) | ab226381              | Abcam          |
| CD3 $\epsilon$ Monoclonal Antibody         | 16-0031-86            | eBiosciences   |
