# Supplementary material
Source: PubMed Central journal article supplement (PMC9156727)
Supplement: NIHMS1759808-supplement-Supp3.pdf [file NIHMS1759808-supplement-Supp3.pdf]

Supplementary Table S2. **Primer information**

| <b>Target gene</b> | <b>Sequence (5' to 3')</b> |
|--------------------|----------------------------|
| <i>Actb-F</i>      | CTAAGGCCAACCGTGAAAAG       |
| <i>Actb-R</i>      | CCATCACAATGCCTGTGGTA       |
| <i>ChgA-F</i>      | CAGAAAGATGATGGTCAGTCGGA    |
| <i>ChgA-R</i>      | TACCATGGCCTCTTCCCAT        |
| <i>Dclk1-F</i>     | CAGGAGTTTCTGTAATAGCAACCA   |
| <i>Dclk1-R</i>     | CCGAGTTCAATTCCGGTGGA       |
| <i>Ddx5-F</i>      | AGAGGTGATGGGCCTATTTGC      |
| <i>Ddx5-R</i>      | TCAAGCGACAAGCTCGACAAT      |
| <i>Gapdh-F</i>     | AATGTGTCCGTCGTGGATCT       |
| <i>Gapdh-R</i>     | CATCGAAGGTGGAAGAGTGG       |
| <i>Ki67-F</i>      | ACCGTGGAGTAGTTTATCTGGG     |
| <i>Ki67-R</i>      | TGTTTCCAGTCCGCTTACTTCT     |
| <i>Klf4-F</i>      | GCCACCCACACTTGTGACTA       |
| <i>Klf4-R</i>      | TGGTAAGGTTTCTCGCCTGT       |
| <i>Lgr5-F</i>      | CAGGTCAATACCGGAGCGAG       |
| <i>Lgr5-R</i>      | GCGAGGCACCATTCAAAGTC       |
| <i>Lyz-F</i>       | TCGTTGTGAGTTGGCCAGAA       |
| <i>Lyz-R</i>       | CGGTCTCCACGGTTGTAGTT       |
| <i>Maf-F</i>       | AGTTGGTGACCATGTCGGTG       |
| <i>Maf-R</i>       | CTCTGCTGCACCCTCTTGAA       |
| <i>MNoV_F</i>      | CACGCCACCGATCTGTTCTG       |
| <i>MNoV_R</i>      | GCGCTGCGCCATCACTC          |
| <i>Muc2-F</i>      | CAGCCAGCTTCTCCATCTTC       |
| <i>Muc2-R</i>      | CAAAAAGCTGCATGACTGGA       |
| <i>Pou2f3-F</i>    | CCTGGGGCAGGATGGTGAAT       |
| <i>Pou2f3-R</i>    | GATCATTTCTGGCTCCACTTGA     |

|                                            |                           |
|--------------------------------------------|---------------------------|
| <i>Villin1-F</i>                           | TCAAGGCAACGAGAGCGAGACTTT  |
| <i>Villin1-R</i>                           | TCGCTGGACATCACAGGAGTTTGT  |
| <i>I14-F</i>                               | GCAACGAAGAACACCACAGA      |
| <i>I14-R</i>                               | ATCGAAAAGCCCGAAAGAGT      |
| <i>I13-F</i>                               | TGAGCAACATCACACAAGACC     |
| <i>I13-R</i>                               | GGCCTTGCGGTTACAGAGG       |
| <i>Gata3-F</i>                             | GCCTTCTTTCTTCATAGTCAGGG   |
| <i>Gata3-R</i>                             | GCAATGCCTGTGGGCTGTACT     |
| <i>Tritrichomonas</i> spp.-F <sup>21</sup> | AGAGGAAGGAGAAGTCGTAACAAGG |
| <i>Tritrichomonas</i> spp.-R <sup>21</sup> | CTCGTGTAAGAAGCCAAGACATCC  |
| <i>Eubacteria 16S-F</i> <sup>21</sup>      | ACTCCTACGGGAGGCAGCAGT     |
| <i>Eubacteria 16S-R</i> <sup>21</sup>      | ATTACCGCGGCTGCTGGC        |
